# Supplementary material for: SARS‐CoV‐2 nucleocapsid protein phase‐separates with RNA and with human hnRNPs
Source: PubMed Central journal article supplement (PMC7737613; doi:10.15252/embj.2020106478), 2020-12-04
Supplement: EMBJ-39-e106478-s001.pdf [file EMBJ-39-e106478-s001.pdf]

## Appendix Figures:

# SARS-CoV-2 nucleocapsid protein undergoes phase separation with RNA and partitions with human hnRNPs

Theodora Myrto Perdikari\*<sup>1</sup>, Anastasia C. Murthy\*<sup>2</sup>, Veronica H. Ryan\*<sup>3</sup>, Scott Watters\*<sup>4</sup>, Mandar T. Naik<sup>4</sup>, Nicolas L. Fawzi<sup>4,5#</sup>

<sup>1</sup>Center for Biomedical Engineering

<sup>2</sup>Molecular Biology, Cell Biology & Biochemistry Graduate Program

<sup>3</sup>Neuroscience Graduate Program

<sup>4</sup>Department of Molecular Pharmacology, Physiology, and Biotechnology

<sup>5</sup>Robert J. and Nancy D. Carney Institute for Brain Science  
Brown University, Providence, RI, USA

\*These authors contributed equally

#Correspondence: [nicolas\\_fawzi@brown.edu](mailto:nicolas_fawzi@brown.edu)

**Keywords:** biomolecular condensates, intrinsically disordered proteins, liquid-liquid phase separation, heterogeneous nuclear ribonucleoproteins, RNA-binding proteins

| Table of Contents  | Page Number |
|--------------------|-------------|
| Appendix Figure S1 | 2           |
| Appendix Figure S2 | 2           |
| Appendix Figure S3 | 3           |

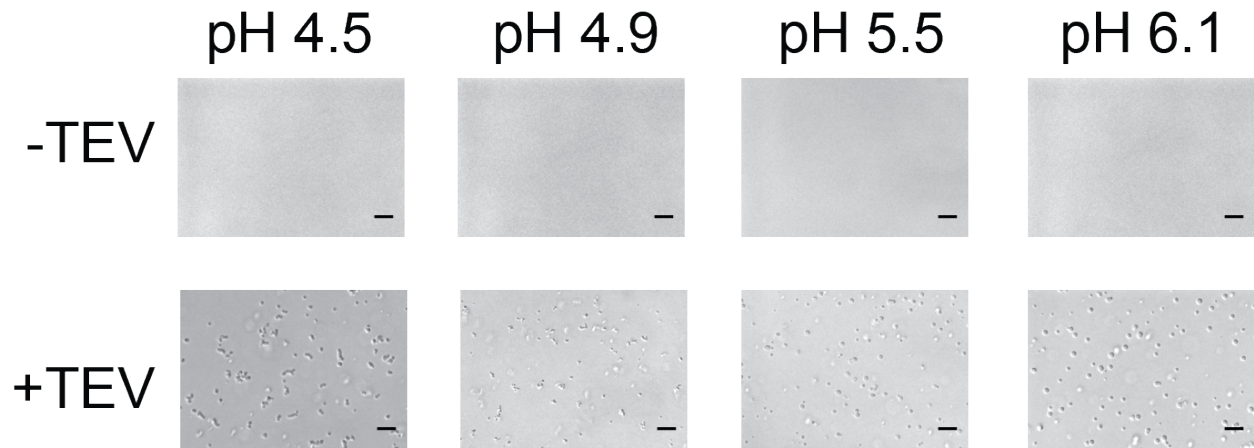

**Appendix Figure S1: Low pH conditions induce aggregation of N in the presence of RNA.** A) DIC micrographs of 50  $\mu\text{M}$  N in varying pH conditions without and with TEV protease to cleave the MBP tag to initiate phase separation. At lower pH conditions, droplets appear to be non-spherical, consistent with less fluid behavior. Scale bars represent 50  $\mu\text{m}$ .

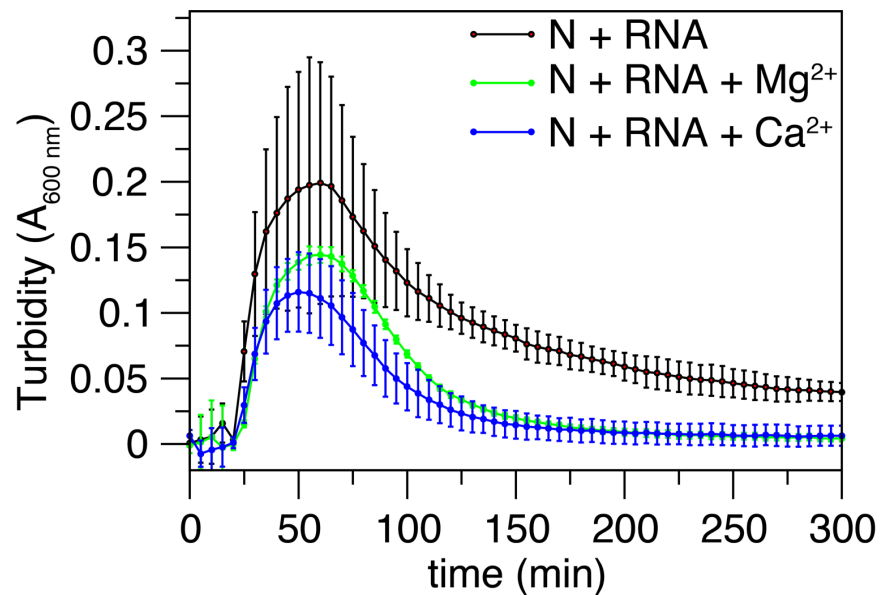

**Appendix Figure S2: Divalent metal salts do not substantially alter N LLPS.** Addition of 2 mM  $\text{MgCl}_2$  or  $\text{CaCl}_2$  does not alter LLPS of 50  $\mu\text{M}$  MBP-N in the presence of 0.5 mg/mL RNA in 50 mM Tris, 70 mM NaCl, pH 7.4 at room temperature. Error bars are standard deviation of three replicates.

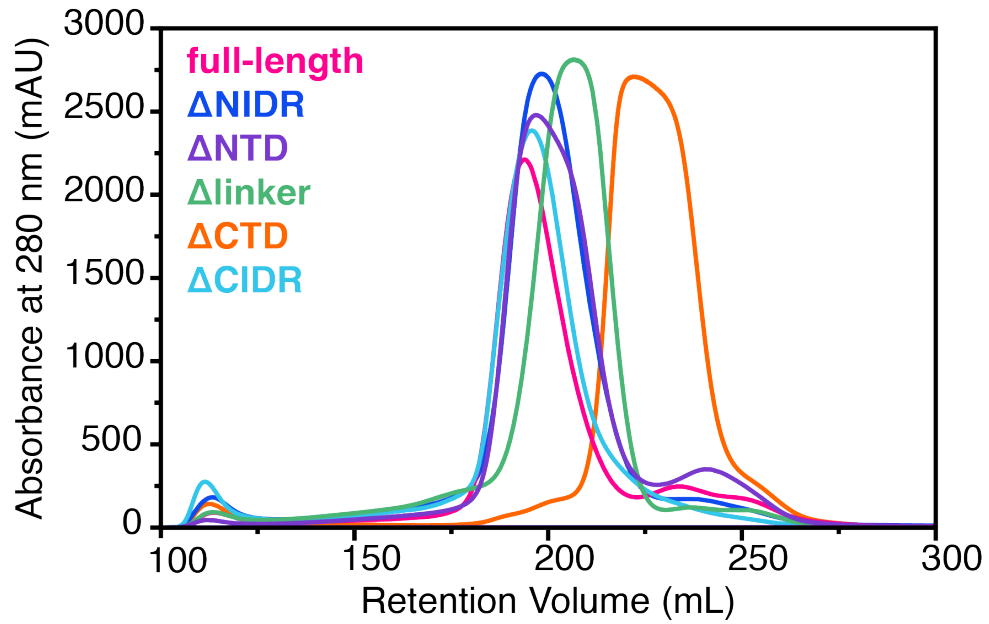

**Appendix Figure S3: Preparative scale gel filtration of N and N domain deletion variants.** Elution times for samples injected on a HiLoad 26/600 Superdex 200 pg column equilibrated in 20 mM Tris, 1.0 M NaCl, pH 8.0.
