# Supplementary material for: SARS‐CoV‐2 nucleocapsid protein phase‐separates with RNA and with human hnRNPs
Source: PubMed Central journal article supplement (PMC7737613; doi:10.15252/embj.2020106478), 2020-12-04
Supplement: EMBJ-39-e106478-s002.pdf [file EMBJ-39-e106478-s002.pdf]

**A**20 mM TRIS pH 7.4, 50 mM NaCl, 20  $\mu$ M protein

DIC

green (N)

red (hnRNP)

merge

DIC

green (N)

red (hnRNP)

merge

hnRNPA2 FL + N

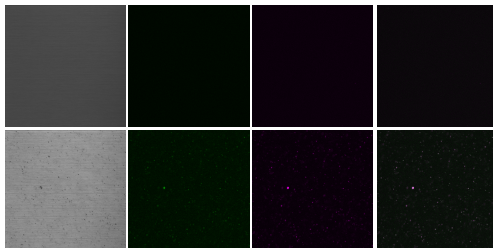

hnRNPA2 FL + N + TEV

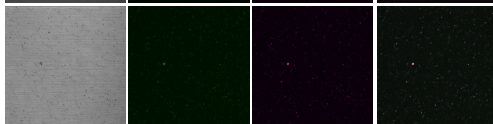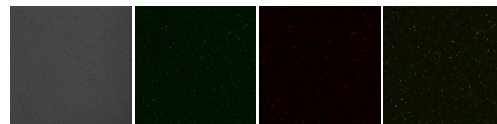**B**20 mM Hepes pH 7, 150 mM NaCl, 2.5  $\mu$ M protein

DIC

green (N)

red (hnRNP)

merge

DIC

green (N)

red (hnRNP)

merge

TDP-43 FL + N

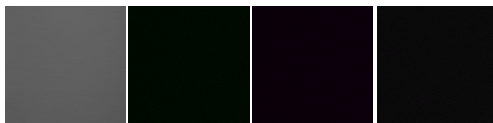

TDP-43 FL + N + TEV

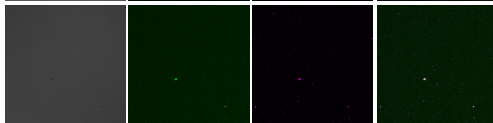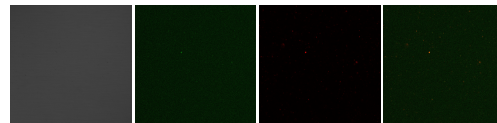**C**20 mM TRIS pH 7.4, 150 mM NaCl, 5  $\mu$ M protein

DIC

green (N)

red (hnRNP)

merge

DIC

green (N)

red (hnRNP)

merge

FUS FL + N

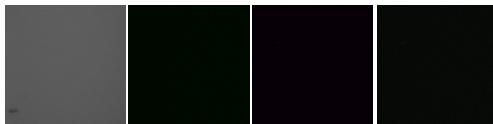

FUS FL + N + TEV

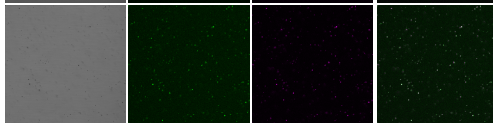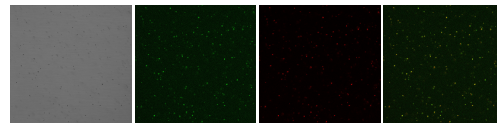—70  $\mu$ m
